# Supplementary material for: Synergistic Effects of Niraparib and Anlotinib on Suppressing the Growth of Ovarian Cancer and Stem-Like Cells by Inhibiting PI3K/Akt Signalling
Source: Research Square preprint supplement (doi:10.21203/rs.3.rs-4779183/v1), 2024-08-26

Synergistic Effects of Niraparib and Anlotinib on Suppressing the Growth of Ovarian Cancer and Stem-Like Cells by Inhibiting PI3K/Akt Signalling

Baiwang Chu 1, Wenhui Sun 1, Ying Wang 1, Yue Zhang 1, Yafan Yuan 1, Linxia Yang 1, Xueyu Wang 1, Tingjie Wen 1, Dong Wang 2, *and Hua Sun 1, *

1 College of Biotechnology, Tianjin University of Science & Technology, Tianjin 300457, China; 826451044@qq.com (B.C.); swenhui0307@163.com (W.S.); 2011217760@qq.com (Y.W.); 1339908101@qq.com (Y.Z); yuanyafan001@163.com (Y.Y.); 18064839067@163.com (L.Y.); xueyu82208906@163.com (X.W.); 1598127045@qq.com (T.W.)

2 Tianjin Medical University Cancer Institute & Hospital, National Clinical Research Center for Cancer, Tianjin’s Clinical Research Center for Cancer, Tianjin 300060, China

***** Correspondence: sunhua@tust.edu.cn (H. S); lvn1314@126.com (D. W.)

Figure S1. Multiple fixed-dose and fixed-ratio screenings of niraparib (NIR) and anlotinib (ANL).


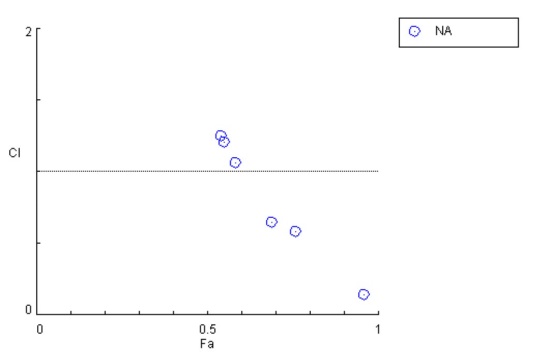


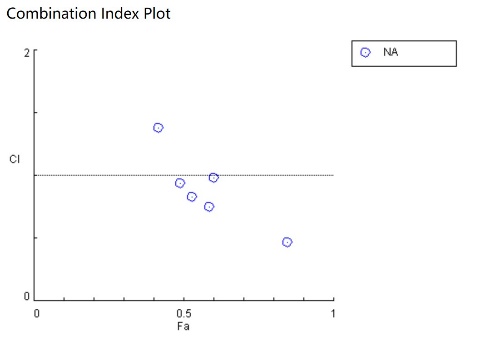

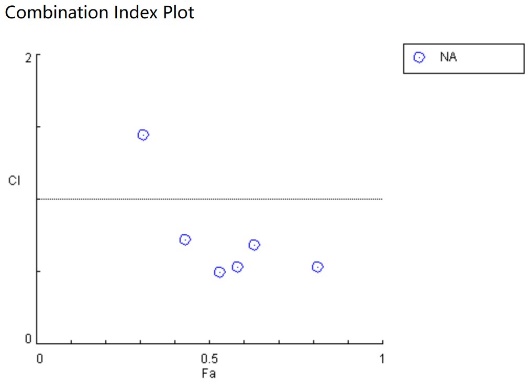

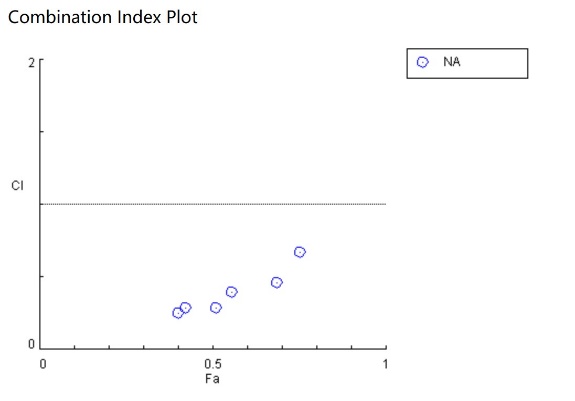

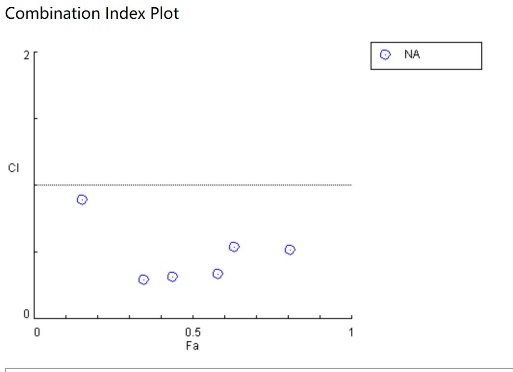

Supplement: Supplementary file 1 [file e396b856d837b8511a1e477b.docx]
